# Supplementary material for: Ultrafine Rh nanocrystals immobilized on 3D boron and nitrogen co-doped graphene–carbon nanotube networks: high-efficiency electrocatalysts towards the methanol oxidation reaction
Source: Royal Society of Chemistry journal article supplement (doi:10.1039/d2cy01234k), 2022-01-01
Supplement: d2cy01234k1.pdf [file d2cy01234k1.pdf]

## Electronic Supplementary Information

### Ultrafine Rh nanocrystals immobilized on 3D boron and nitrogen co-doped graphene-carbon nanotube networks: high-efficiency electrocatalysts towards methanol oxidation reaction

Ya Xue, Jie Xiong, Heng Zhang, Haiyan He, and Huajie Huang\*

College of Mechanics and Materials, Hohai University, Nanjing 210098, China

\*E-mail: huanghuajie@hhu.edu.cn

#### Supplementary Results

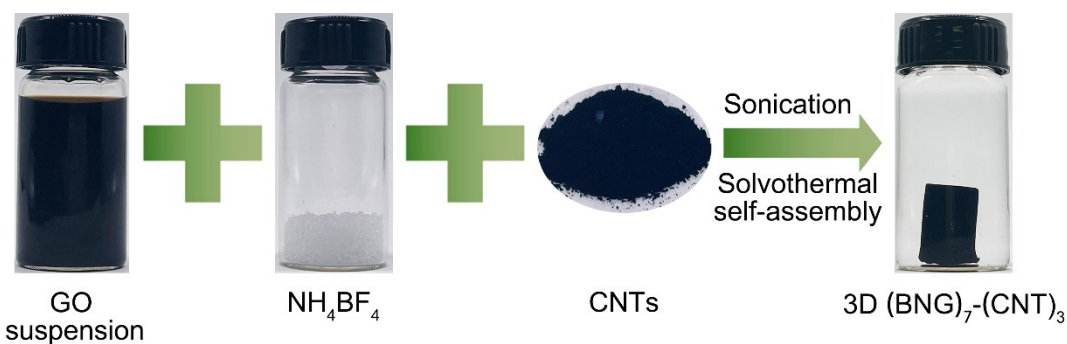

**Fig. S1** The synthetic process for the 3D  $(\text{BNG})_7-(\text{CNT})_3$  hydrogel. It includes: (1) mixture of GO suspension, CNTs and  $\text{NH}_4\text{BF}_4$  by magnetic stirring and ultrasonic treatment; (2) generation of 3D BNG-CNT hydrogels by a solvothermal co-assembly process.

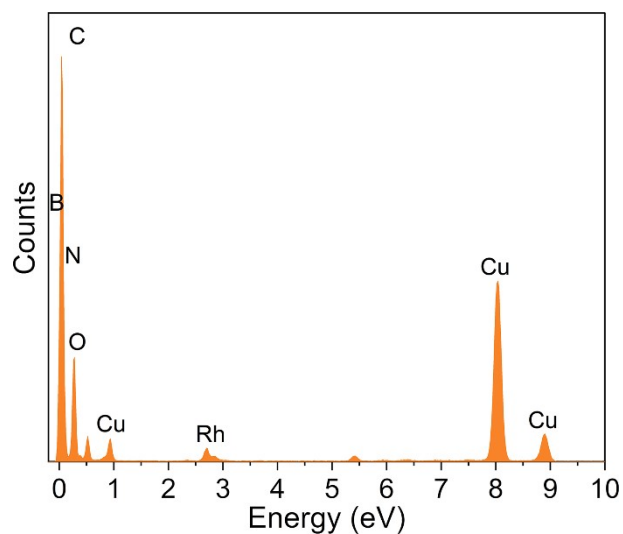

**Fig. S2** EDX spectrum of 3D Rh/(BNG)<sub>7</sub>-(CNT)<sub>3</sub> catalyst verifies the presence of B, N, C, and Rh components in the hybrid. Since the sample was held on a Cu grid, Cu signals were also detected.

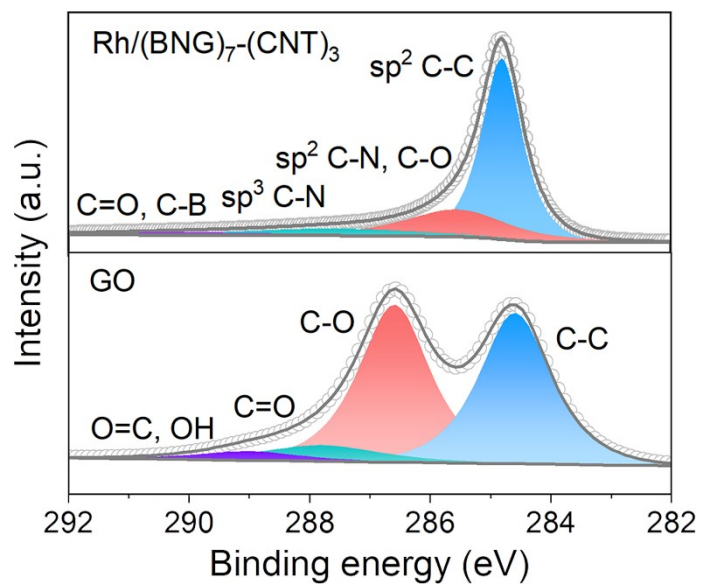

**Fig. S3** High-resolution C 1s spectra of the Rh/(BNG)<sub>7</sub>-(CNT)<sub>3</sub> and GO materials.

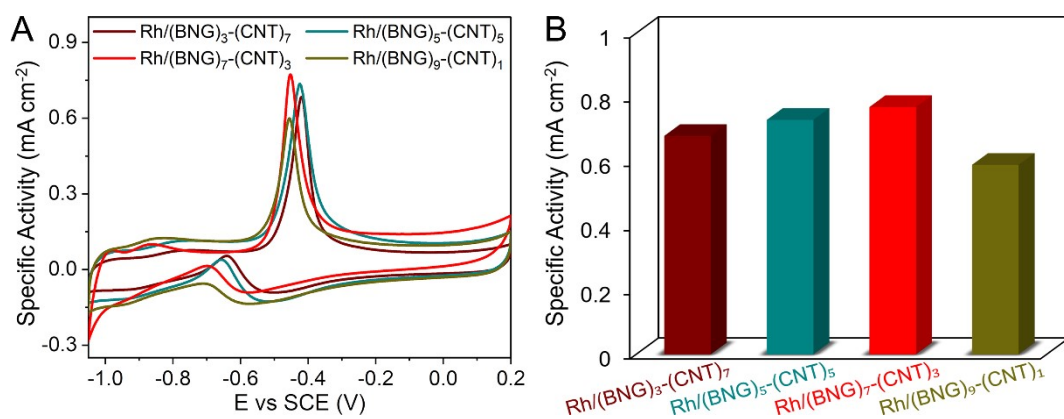

**Fig. S4** (A) ECSA-normalized CV curves of Rh/BNG-CNT architectures with different BNG/CNT ratios in a mixture of 1 M KOH and 1 M CH<sub>3</sub>OH at 50 mV s<sup>-1</sup>. (B) ECSA-normalized specific activities for different catalysts.

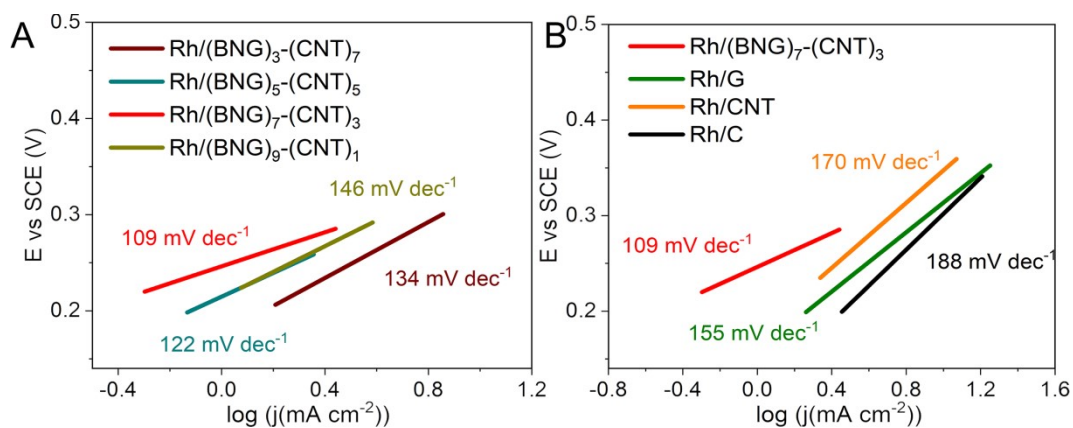

**Fig. S5** Tafel curves of (A) the Rh/BNG-CNT architectures with varying BNG/CNT ratios, and (B) Rh/(BNG)<sub>7</sub>-(CNT)<sub>3</sub>, Rh/G, Rh/CNT, and Rh/C in a mixture of 1 M KOH and 1 M CH<sub>3</sub>OH at 50 mV s<sup>-1</sup>.

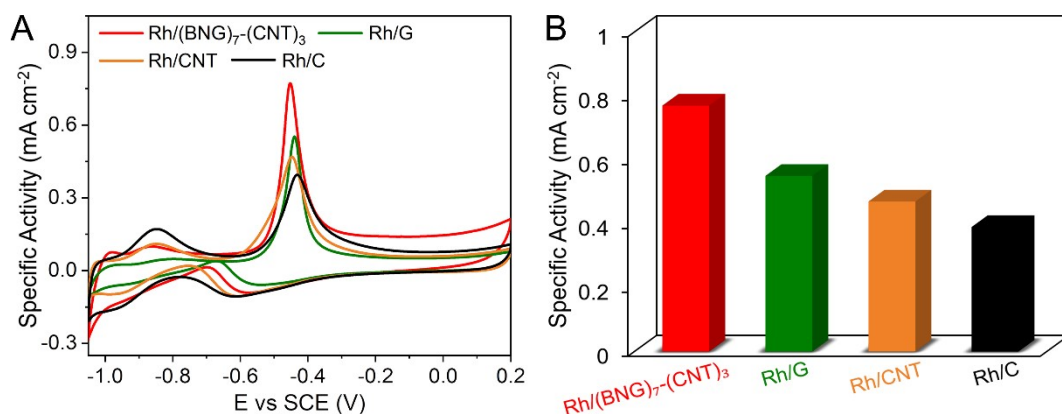

**Fig. S6** (A) ECSA-normalized CV curves of the Rh/(BNG)<sub>7</sub>-(CNT)<sub>3</sub> and other reference catalysts in a mixture of 1 M KOH and 1 M CH<sub>3</sub>OH at 50 mV s<sup>-1</sup>. (B) ECSA-normalized specific activities for different catalysts.

**Table S1.** Methanol oxidation behaviors on different catalysts.

| Electrode                                 | ECSA (m <sup>2</sup> g <sup>-1</sup> ) | Mass activity (mA mg <sup>-1</sup> ) | Specific activity (mA cm <sup>-2</sup> ) |
|-------------------------------------------|----------------------------------------|--------------------------------------|------------------------------------------|
| Rh/(BNG) <sub>3</sub> -(CNT) <sub>7</sub> | 63.3                                   | 432.5                                | 0.68                                     |
| Rh/(BNG) <sub>5</sub> -(CNT) <sub>5</sub> | 77.5                                   | 570.4                                | 0.73                                     |
| Rh/(BNG) <sub>7</sub> -(CNT) <sub>3</sub> | 105.4                                  | 814.0                                | 0.77                                     |
| Rh/(BNG) <sub>9</sub> -(CNT) <sub>1</sub> | 59.7                                   | 357.5                                | 0.59                                     |
| Rh/G                                      | 52.2                                   | 288.5                                | 0.55                                     |
| Rh/CNT                                    | 44.8                                   | 210.2                                | 0.46                                     |
| Rh/C                                      | 36.0                                   | 142.3                                | 0.39                                     |
| Pt/C                                      | 60.6                                   | 292.8                                | 0.48                                     |
| Pd/C                                      | 68.3                                   | 270.3                                | 0.40                                     |

**Table S2.** Comparison of methanol oxidation behavior on the 3D Rh/(BNG)<sub>7</sub>-(CNT)<sub>3</sub> and various Rh-based electrocatalysts.

| Catalyst                                  | ECSA (m <sup>2</sup> g <sup>-1</sup> ) | Mass activity (mA mg <sup>-1</sup> ) | Scan rate (mV s <sup>-1</sup> ) | Electrolyte                         | Reference |
|-------------------------------------------|----------------------------------------|--------------------------------------|---------------------------------|-------------------------------------|-----------|
| Rh/(BNG) <sub>7</sub> -(CNT) <sub>3</sub> | 105.4                                  | 814.0                                | 50                              | 1 M KOH +<br>1 M CH <sub>3</sub> OH | This work |
| Rh nanosheets                             | 45.5                                   | 333                                  | 50                              | 1 M KOH +<br>1 M CH <sub>3</sub> OH | [22]      |
| Rh nanotubes                              | 60.9                                   | 325                                  | 50                              | 1 M KOH +<br>1 M CH <sub>3</sub> OH | [61]      |
| Rh nanospheres                            | 50.7                                   | 292                                  | 50                              | 1 M KOH +<br>1 M CH <sub>3</sub> OH | [62]      |
| Rh sheets/<br>graphene                    | 48.6                                   | 264.0                                | 50                              | 1 M KOH +<br>1 M CH <sub>3</sub> OH | [20]      |
| Rh/doped<br>graphene                      | 81.4                                   | 721.5                                | 50                              | 1 M KOH +<br>1 M CH <sub>3</sub> OH | [25]      |
| Rh/carbon<br>nanohorns                    | 102.5                                  | 784.0                                | 50                              | 1 M KOH +<br>1 M CH <sub>3</sub> OH | [23]      |

**Table S3.** The charge-transfer resistance ( $R_{ct}$ ) of different catalysts.

| Catalyst                                  | $R_{ct}$ value ( $\Omega$ ) | Error (%) |
|-------------------------------------------|-----------------------------|-----------|
| Rh/(BNG) <sub>7</sub> -(CNT) <sub>3</sub> | 14.9                        | 2.4       |
| Rh/G                                      | 20.6                        | 1.5       |
| Rh/CNT                                    | 22.1                        | 3.4       |
| Rh/C                                      | 6664.0                      | 3.8       |
